# Supplementary material for: Giant photonic spin Hall effect induced by hyperbolic shear polaritons
Source: Royal Society of Chemistry journal article supplement (doi:10.1039/d3cp00205e), 2023-01-01
Supplement: d3cp00205e1.pdf [file d3cp00205e1.pdf]

## Electronic Supplementary Information

### Giant photonic spin Hall effect induced by hyperbolic shear polaritons

Guangyi Jia,<sup>1,\*</sup> Wenxuan Xue,<sup>1</sup> Zhenxin Jia,<sup>1</sup> Mathias Schubert<sup>2,†</sup>

<sup>1</sup>School of Science, Tianjin University of Commerce, Tianjin 300134, P. R. China

<sup>2</sup>Department of Electrical and Computer Engineering, University of Nebraska-Lincoln, Lincoln, Nebraska 68588, USA

E-mails: \*gyjia87@163.com; †schubert@engr.unl.edu

#### Calculation method for the permittivity tensor of $\beta$ -Ga<sub>2</sub>O<sub>3</sub>

The  $\beta$ -Ga<sub>2</sub>O<sub>3</sub> monoclinic permittivity elements consist of the high-frequency contributions, the dipole charge resonances, and the free charge-carrier contributions, which can be calculated by the following equations

$$\varepsilon_{xx} = \varepsilon_{\infty,xx} + \sum_{j=1}^8 \rho_{j,B_u} \sin^2 \alpha_j + \mathcal{G}_{FCC,x} \quad (\text{S1})$$

$$\varepsilon_{yy} = \varepsilon_{\infty,yy} + \sum_{j=1}^8 \rho_{j,B_u} \sin^2 \alpha_j + \mathcal{G}_{FCC,y} \quad (\text{S2})$$

$$\varepsilon_{zz} = \varepsilon_{\infty,zz} + \sum_{j=1}^4 \rho_{j,A_u} + \mathcal{G}_{FCC,z} \quad (\text{S3})$$

$$\varepsilon_{xy} = \varepsilon_{yx} = \varepsilon_{\infty,xy} + \sum_{j=1}^8 \rho_{j,B_u} \sin \alpha_j \cos \alpha_j \quad (\text{S4})$$

where  $\varepsilon_{\infty}$  is the permittivity at high frequency for different directions, the  $A_u$  and  $B_u$  are long-wavelength active modes (infrared and far-infrared); the  $A_u$  modes are polarized along axis  $b$  only and the  $B_u$  modes are polarized within the  $a$ - $c$  plane. The factor  $\alpha_j$  is the angle between the dipole oscillation axis of  $B_u$  mode  $j$  and the axis  $a$  of the  $\beta$ -Ga<sub>2</sub>O<sub>3</sub> crystal. The 8(4) modes mean that this material has 8(4) long-wave active intrinsic modes of vibration for the  $B_u$  ( $A_u$ ) modes. The Lorentzian-broadened oscillator function  $\rho_{j,(A_u,B_u)}$  stands for the energy-dependent contribution to the long-wavelength polarization response of an uncoupled electric dipole charge oscillation of  $B_u$  mode  $j$  ( $A_u$  mode  $j$ ). The Drude model function  $\mathcal{G}_{FCC}$  gives the energy-dependent contribution to the long-wavelength polarization response of free charge carriers for different directions. The Drude model

function  $\mathcal{G}_{FCC}$  and the Lorentzian-broadened oscillator function  $\rho_{j,(A_u,B_u)}$  can be expressed as

$$\mathcal{G}_{FCC,(x,y,z)} = \frac{e^2 N}{\epsilon_0 m_{eff,(z,y,z)} \omega(\omega + i\gamma_{p,(x,y,z)})} \quad (S5)$$

$$\rho_{j,(A_u,B_u)} = \frac{A_{j,(A_u,B_u)}}{\omega_{TO,[j,(A_u,B_u)]}^2 - \omega^2 - i\omega\kappa_{j,(A_u,B_u)}} \quad (S6)$$

Here,  $N$  is the free charge-carrier density.  $m_{eff,(x,y,z)}$  and  $\gamma_{p,(x,y,z)}$  are the electron effective mass and the damping coefficient along different directions, respectively.  $\epsilon_0$  is the permittivity in vacuum, and  $e$  is the amount of the electrical unit charge.  $A_{j,(A_u,B_u)}$ ,  $\omega_{TO,[j,(A_u,B_u)]}$ , and  $\kappa_{j,(A_u,B_u)}$  indicate the amplitude, resonance frequency, and broadening parameter of a lattice resonance with transverse optical (TO) character for  $A_u$  mode  $j$  or  $B_u$  mode  $j$ . The  $\beta$ -Ga<sub>2</sub>O<sub>3</sub> monoclinic crystals are electron doped by different free charge-carrier densities  $N$  with increasing  $\log_{10}N$  from 18.0 to 19.4. The specific parametrization and computational details are available in ref. 22 in the main article.

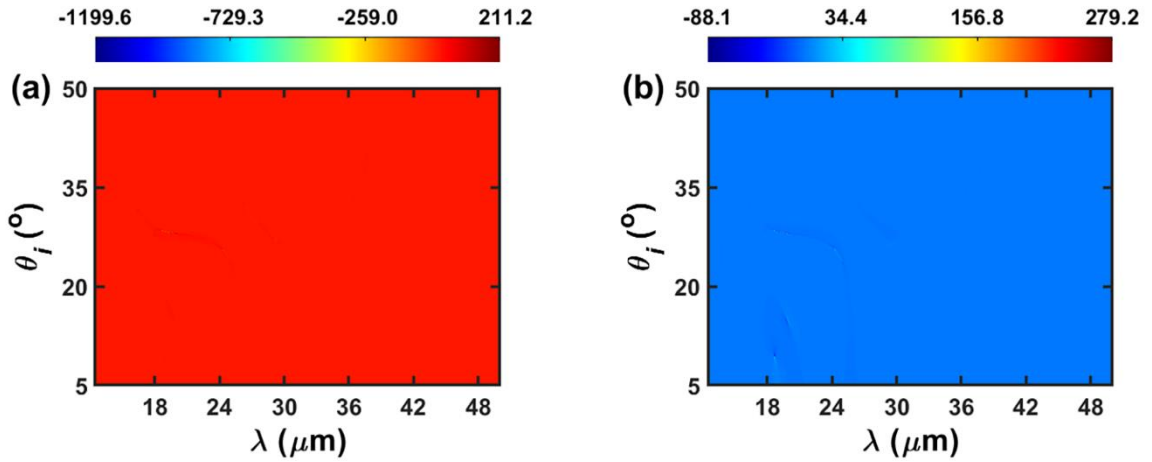

**Fig. S1** Original color maps of Fig. 3(c) and (d). (a) In-plane and (b) transverse spin-dependent shifts versus the parameters of  $\theta_i$  and  $\lambda$ . The color bars are scaled in the unit of  $\lambda$ .

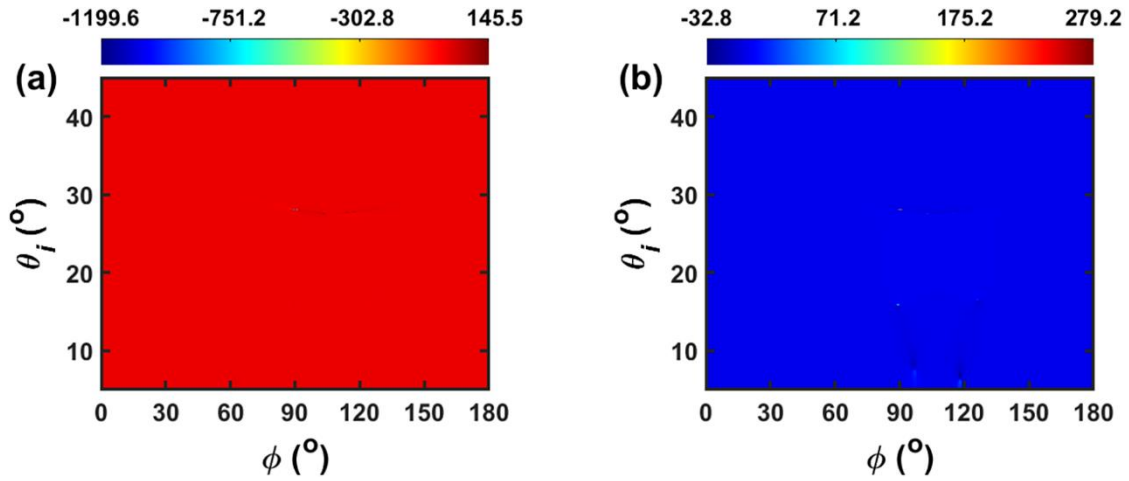

**Fig. S2** Original color maps of Fig. 6(c) and (d). (a) In-plane and (b) transverse spin-dependent shifts versus the parameters of  $\theta_i$  and  $\phi$ . The color bars are scaled in the unit of  $\lambda$ .

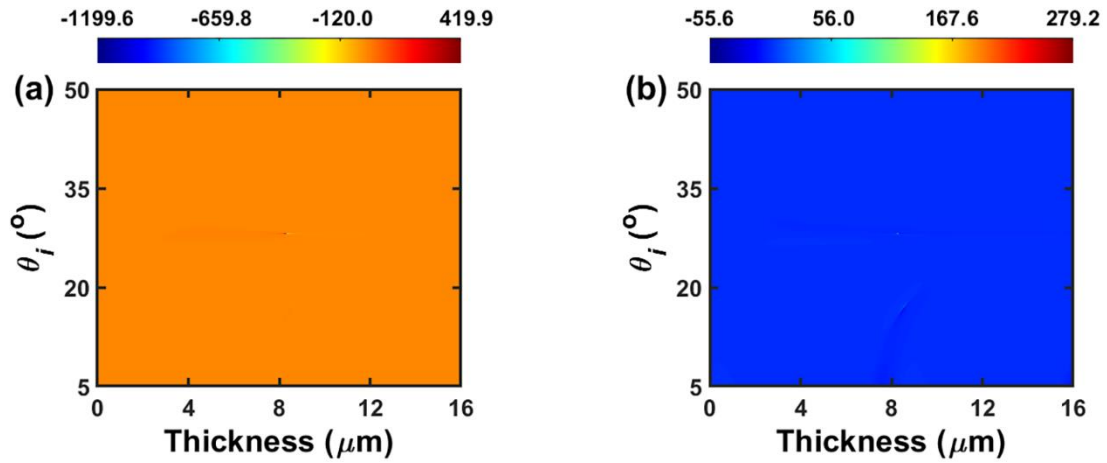

**Fig. S3** Original color maps of Fig. 7(c) and (d). (a) In-plane and (b) transverse spin-dependent shifts versus the incident angle and the thickness of biosensing medium. The refractive index of biosensing medium is  $n_s = 1.419$ . The color bars are scaled in the unit of  $\lambda$ .

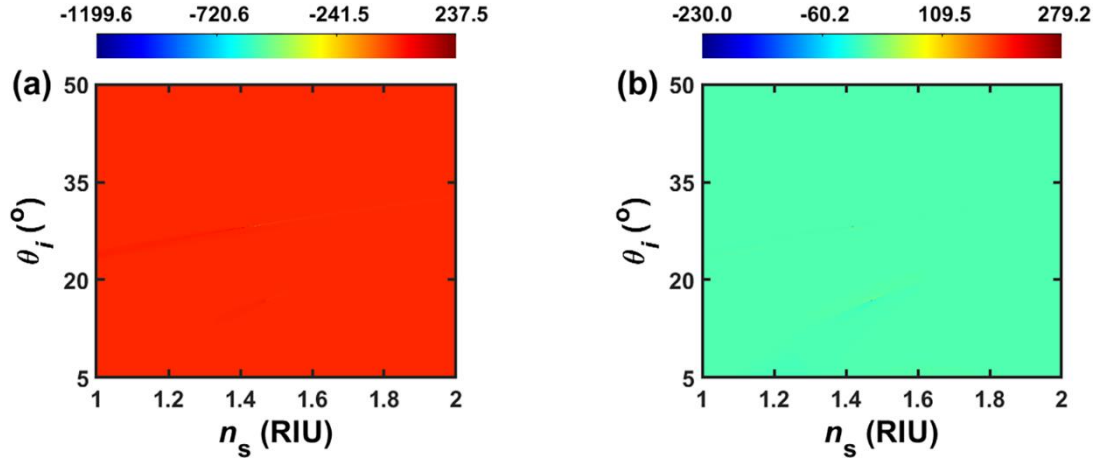

**Fig. S4** Original color maps of Fig. 8(c) and (d). (a) In-plane and (b) transverse spin-dependent shifts versus the parameters of  $\theta_i$  and  $n_s$ . The color bars are scaled in the unit of  $\lambda$ .

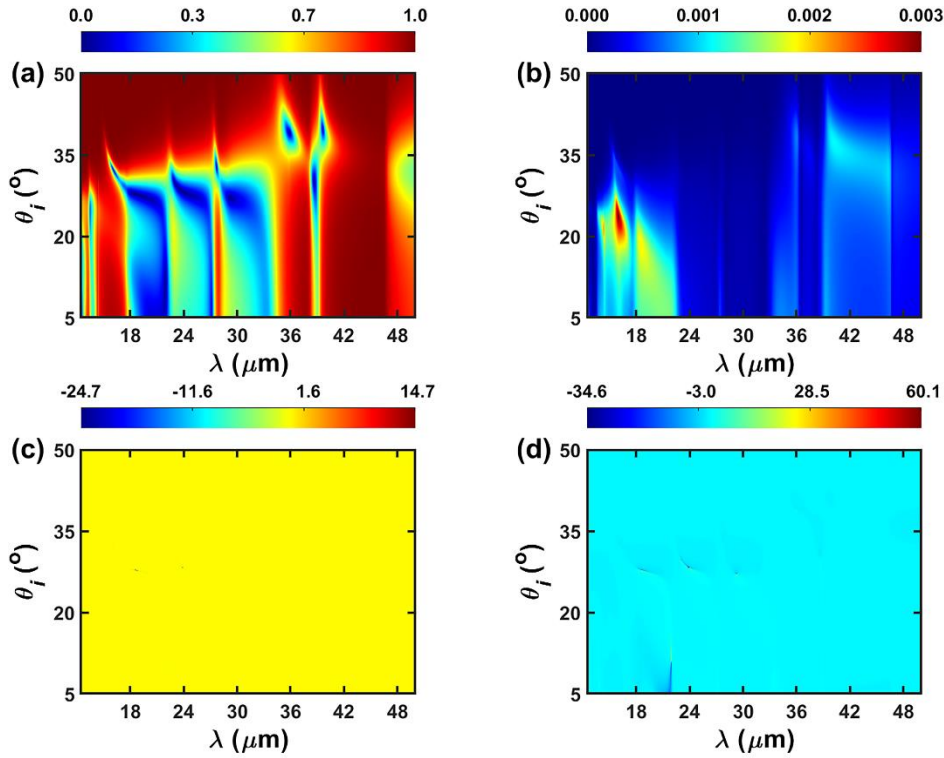

**Fig. S5** Variations of the Fresnel reflection coefficients (a)  $|r_{pp}|$  and (b)  $|r_{sp}|$  with respect to the incident angle  $\theta_i$  and the wavelength  $\lambda$  of excitation light. (c) In-plane and (d) transverse spin-dependent shifts versus the parameters of  $\theta_i$  and  $\lambda$ . The color bars in (a)(b) are unitless while they are scaled in the unit of  $\lambda$  in (c)(d). The off-diagonal permittivity element  $\epsilon_{xy}$  of  $\beta$ -Ga<sub>2</sub>O<sub>3</sub> is set to be zero, and all the other factors are the same with those of Figs. 3 and S1.

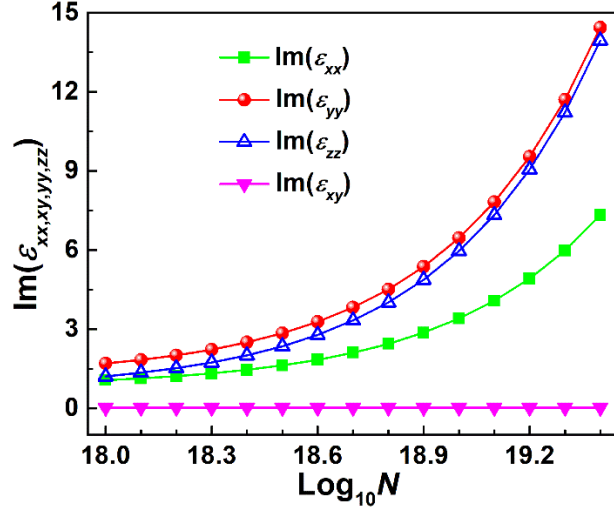

**Fig. S6** Imaginary parts of permittivity elements  $\epsilon_{xx}$ ,  $\epsilon_{yy}$ ,  $\epsilon_{zz}$  and  $\epsilon_{xy}$  for the monoclinic  $\beta$ -Ga<sub>2</sub>O<sub>3</sub> crystal at different doping concentrations  $N$  (in cm<sup>-3</sup>). The wavelength is  $\lambda = 19.6$   $\mu$ m. The symbols are the practical data while solid lines are just drawn as a guide to the eye.

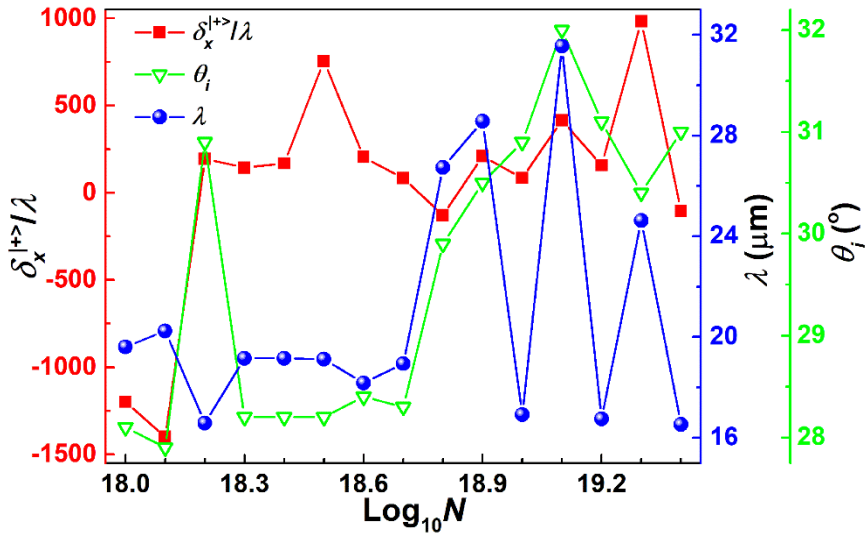

**Fig. S7** The largest in-plane photonic spin Hall shifts and their corresponding  $\theta_i$  and  $\lambda$  values for different  $\log_{10}N$  values.

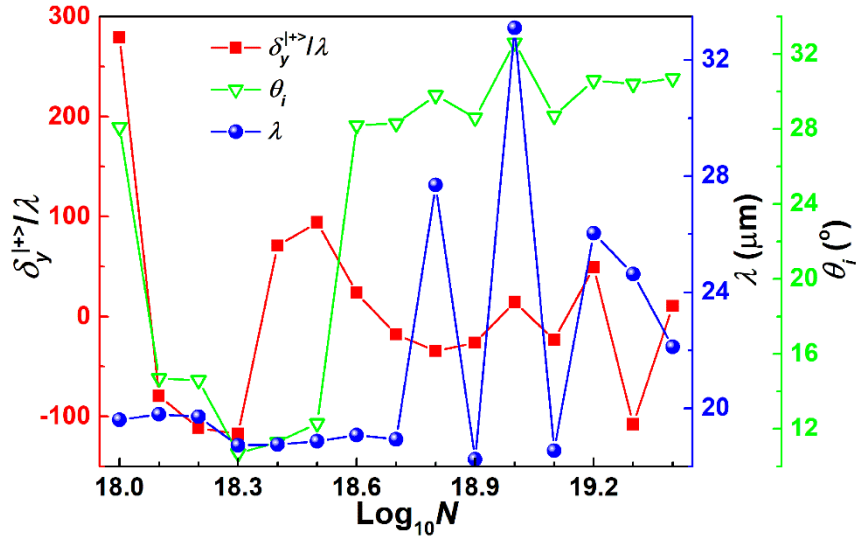

**Fig. S8** The largest transverse photonic spin Hall shifts and their corresponding  $\theta_i$  and  $\lambda$  values for different  $\text{log}_{10} N$  values.

**Table S1** Real parts of permittivity tensor of  $\beta$ -Ga<sub>2</sub>O<sub>3</sub> and the types of HShPs at different doping concentrations  $N$  in  $\beta$ -Ga<sub>2</sub>O<sub>3</sub>. The  $\lambda$  values correspond to the wavelengths at which in-plane photonic spin Hall shifts give their respective maximum displacements.

| $\text{Log}_{10}N$ | Frequency<br>( $\text{cm}^{-1}$ ) | $\lambda$ ( $\mu\text{m}$ ) | $\text{Re}(\epsilon_{xx})$ | $\text{Re}(\epsilon_{yy})$ | $\text{Re}(\epsilon_{zz})$ | $\text{Re}(\epsilon_{xy})$ | Types of HShPs       |
|--------------------|-----------------------------------|-----------------------------|----------------------------|----------------------------|----------------------------|----------------------------|----------------------|
| 18.0               | 510                               | 19.6                        | -4.5582                    | 9.3249                     | -5.4666                    | -4.8064                    | Type II in-plane     |
| 18.1               | 494                               | 20.2                        | -7.3034                    | 7.0059                     | -8.9515                    | -5.123                     | Type II in-plane     |
| 18.2               | 603                               | 16.6                        | -1.3175                    | -12.667                    | 2.4216                     | 3.5782                     | Type II out-of-plane |
| 18.3               | 522                               | 19.2                        | -4.2878                    | 11.307                     | -4.0737                    | -4.9648                    | Type II in-plane     |
| 18.4               | 522                               | 19.2                        | -4.8682                    | 11.155                     | -4.2262                    | -4.9648                    | Type II in-plane     |
| 18.5               | 523                               | 19.1                        | -5.4836                    | 11.193                     | -4.2977                    | -4.9952                    | Type II in-plane     |
| 18.6               | 550                               | 18.2                        | -3.2105                    | 23.109                     | -1.9847                    | -7.7506                    | Type II in-plane     |
| 18.7               | 528                               | 18.9                        | -6.954                     | 11.928                     | -4.2746                    | -5.1954                    | Type II in-plane     |
| 18.8               | 374                               | 26.7                        | -7.3795                    | 0.47965                    | 4.4136                     | 8.2769                     | Type I in-plane      |
| 18.9               | 350                               | 28.6                        | 6.0318                     | 9.6965                     | -1.2521                    | -8.5422                    | Type I out-of-plane  |
| 19.0               | 591                               | 16.9                        | -9.8706                    | -22.336                    | -0.8027                    | 5.5414                     | Elliptical           |
| 19.1               | 317                               | 31.5                        | -28.758                    | -1.2121                    | -20.632                    | 0.91674                    | Elliptical           |
| 19.2               | 597                               | 16.8                        | -14.196                    | -19.613                    | -1.9577                    | 4.3775                     | Elliptical           |
| 19.3               | 406                               | 24.6                        | -16.114                    | 0.99082                    | 7.7346                     | 9.3142                     | Type I in-plane      |
| 19.4               | 605                               | 16.5                        | -21.075                    | -18.251                    | -3.8093                    | 3.368                      | Elliptical           |

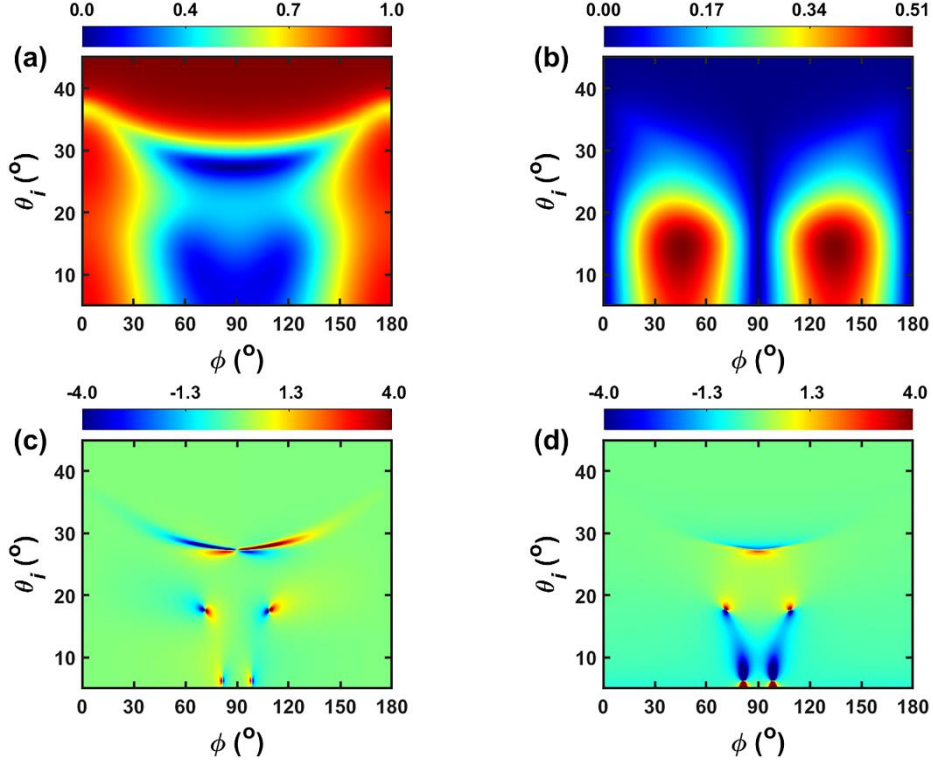

**Fig. S9** Variations of the Fresnel reflection coefficients (a)  $|r_{pp}|$  and (b)  $|r_{sp}|$  with respect to the incident angle  $\theta_i$  and the azimuth angle  $\phi$ . (c) In-plane and (d) transverse spin-dependent shifts versus the parameters of  $\theta_i$  and  $\phi$ . The color bars in (a)(b) are unitless while they are scaled in the unit of  $\lambda$  in (c)(d). The off-diagonal permittivity element  $\epsilon_{xy}$  of  $\beta$ -Ga<sub>2</sub>O<sub>3</sub> is set to be zero, and all the other factors are the same with those of Figs. 6 and S2.

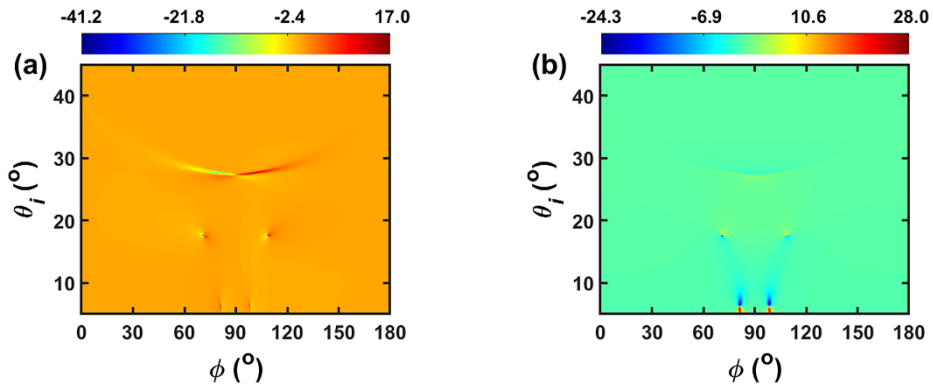

**Fig. S10** Original color maps of Fig. S9(c) and (d). (a) In-plane and (b) transverse spin-dependent shifts versus the parameters of  $\theta_i$  and  $\phi$  at  $\epsilon_{xy} = 0.0$ .
